# Supplementary material for: Fabrication of novel carbon species into porous g-C3N4 nanosheet frameworks with enhanced photocatalytic performance
Source: Royal Society of Chemistry journal article supplement (doi:10.1039/d1nj02217b), 2021-01-01
Supplement: d1nj02217b1.pdf [file d1nj02217b1.pdf]

# **Fabrication of novel carbon species into porous g-C<sub>3</sub>N<sub>4</sub> nanosheets framework with enhanced photocatalytic performance**

Weinan Xing<sup>a,b,c\*</sup>, Yichi Zhang<sup>a</sup>, Ke Cheng<sup>a</sup>, Jinghui Zou<sup>a</sup>, Guangyu Wu<sup>a,c,d\*</sup>

a College of Biology and the Environment, Co-Innovation Center for the Sustainable Forestry in Southern China, Nanjing Forestry University, Nanjing 210037, China

b Key Laboratory of Advanced Energy Materials Chemistry (Ministry of Education), College of Chemistry, Nankai University, Tianjin 300071, China

c Key Laboratory of Functional Molecular Solids, Ministry of Education, Anhui Normal University, Wuhu 241000, China

d Jiangsu Provincial Key Laboratory of Palygorskite Science and Applied Technology, Huaiyin Institute of Technology, Huaian 223003, China

\* Correspondence: xingwn@njfu.edu.cn(X.W. ), gywuchem@njfu.edu.cn (W. G.)

## **Experimental**

### **Characterization**

The transmission electron microscopy (TEM) experiment was performed using JEM-1400. X-ray diffraction (XRD) patterns were measured by RigakuD/max-2000 using Cu K $\alpha$  radiation. X-ray photoelectron spectroscopy (XPS) analysis was obtained using a HI5700ESCA system with X-ray photoelectron spectroscope, which has an Al K (1486.6 eV) monochromatic X-ray radiation. The UV-vis diffuse reflectance spectra (DRS) were measured using UV-vis spectrophotometer (Hitachi UV-3010) at room temperature.

### **Photoelectrochemical characterization**

Photoelectrochemical measurements were conducted in a conventional three-electrode cell system on CHI760E electrochemical workstation. In this electrochemical system, a Pt pole, Ag/AgCl electrode, and the as-prepared sample electrode coated at FTO glass were used as the counter electrode (CE), reference electrode (RE), and the working electrode (WE). Na<sub>2</sub>SO<sub>4</sub> aqueous solution (0.5 M, 50 mL) was used as the electrolyte. A 300W Xe lamp with cutoff filter (> 420 nm) was selected as the light source. The working electrodes were prepared in atypical method: 10 mg photocatalyst was dispersed in a mixed solution of Nafion and ethanol to obtain a slurry. Then the resulting slurry was dropped on FTO glass electrode and dried at 80 °C.

### **Photocatalytic degradation reaction**

The photocatalytic performances of the as-prepared catalyst are explored by the degradation of Rhodamine B (RhB) and tetracycline hydrochloride (TC-HCl).

Typically, 100 mg catalyst was suspended in 100 mL RhB (10 mg/L) liquid solution by ultrasound generator for 5 min. Then, the mixed solution was transferred into a Pyrex photocatalytic reactor with a circulating water to maintain a constant temperature 25 °C. Before irradiation, the suspension was stirred in the dark for 30 min to achieve the absorption–desorption equilibrium (Fig.S5 and Fig.S6). The solution was irradiated by a 300 W Xenon lamp with an optical filter ( > 420 nm). In order to supervise the photocatalytic reaction, 3 mL of RhB solution was sampled at the certain time intervals and centrifuged to remove the catalyst power. The solution was analyzed by UV-vis spectrophotometer at the absorption band maximum (554 nm). The TC-HCl degradation process is similar with RhB, except the monitoring wavelength is 357 nm.

The equation of the degradation rate was as follows :

$$\text{Degradation rates} = \frac{C_0 - C_t}{C_0} \times 100\%$$

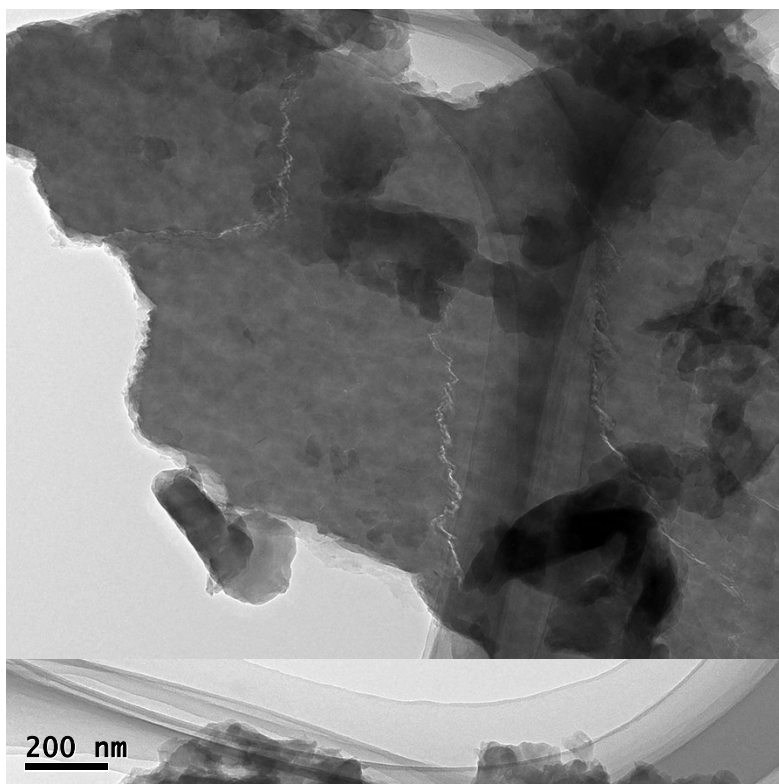

Fig.S1 TEM image of CN

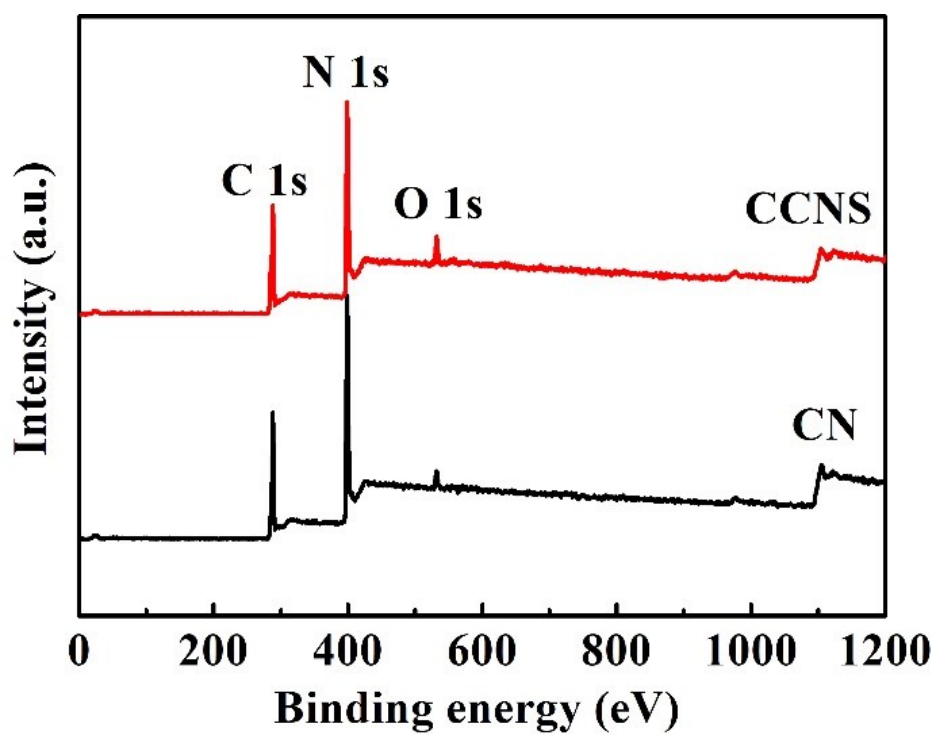

Fig.S2 XPS survey spectra over CN and CCNS

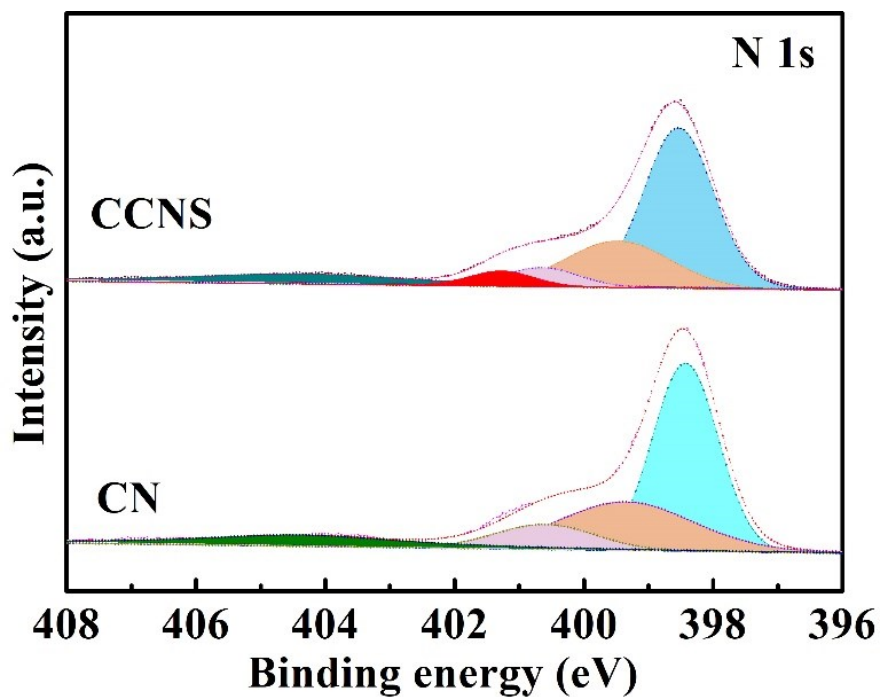

Fig.S3 XPS spectra of N 1 s over CN and CCNS

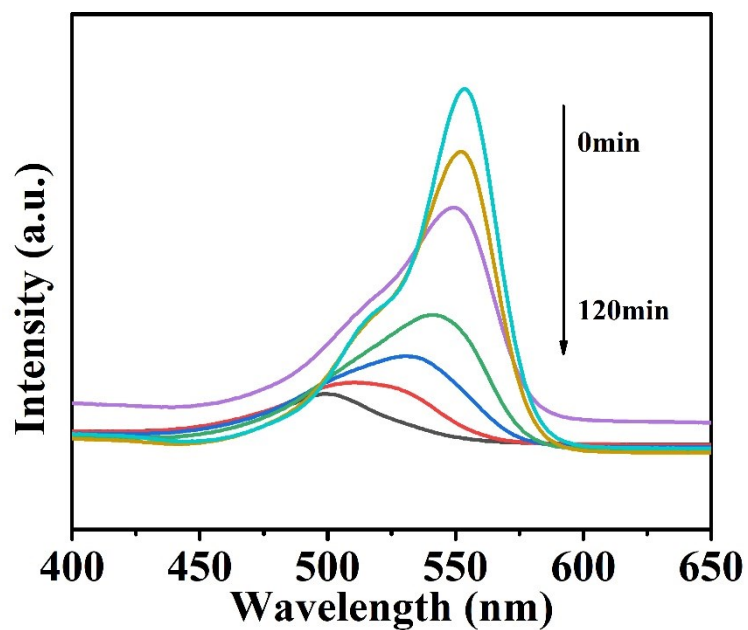

Fig.S4 the UV-vis spectra of degradation of RhB over CCNS

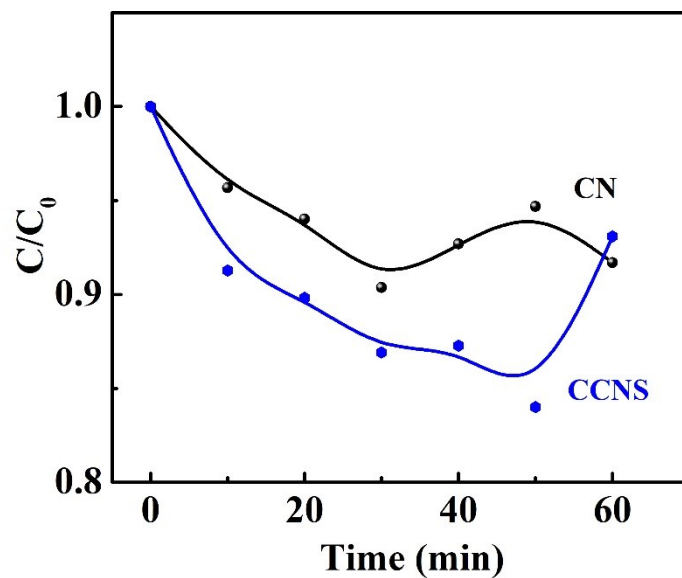

Fig.S5 adsorption curves of TC-HCl over different photocatalysts

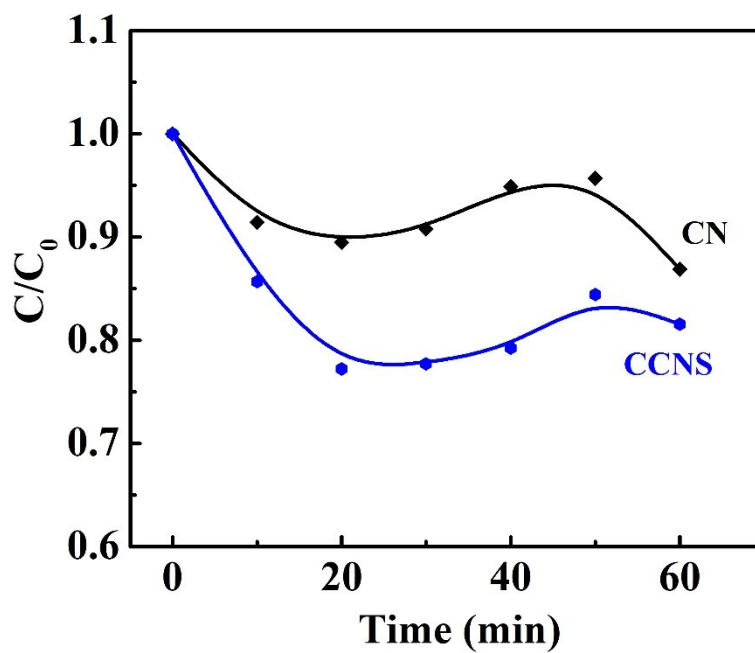

Fig.S6 adsorption curves of RhB over different photocatalysts
